# Supplementary material
Source: PubMed Central journal article supplement (PMC4594275)
Supplement: bph0172-4726-sd1.pdf [file bph0172-4726-sd1.pdf]

**Table 1: Cell cycle analysis**

| <b>Sample</b>               | <b>Sub G1</b>           | <b>G1</b>                | <b>S</b>                 | <b>G2/M</b>             |
|-----------------------------|-------------------------|--------------------------|--------------------------|-------------------------|
| <b>Control</b>              | 1.45±0.02               | 74.08±2.2                | 16.72±0.20               | 7.9±0.19                |
| <b>EPA 40 µM</b>            | 1.74±0.02 <sup>NS</sup> | 72.12±1.9 <sup>NS</sup>  | 19.28±0.22 <sup>NS</sup> | 7.08±0.15 <sup>NS</sup> |
| <b>TCDD 10nM</b>            | 3.53±0.03 <sup>NS</sup> | 72.07±1.8 <sup>NS</sup>  | 16.21±0.20 <sup>NS</sup> | 7.39±0.20 <sup>NS</sup> |
| <b>EPA 40 µM+ TCDD 10nM</b> | 1.51±0.02 <sup>NS</sup> | 74.33±1.92 <sup>NS</sup> | 17.01±0.16 <sup>NS</sup> | 7.88±0.21 <sup>NS</sup> |

Cells were treated with TCDD (10 nM) for 48 hours, in the presence or absence of EPA. For EPA pre-treatment, cells were exposed to EPA (40 µM) for 48 h followed by TCDD treatment for 48 h. Following the treatment period, the cells were fixed with 70% ethanol and stained with propidium iodide for cell cycle analysis as mentioned in materials and methods. Results shown are Mean ± SE, results of 3 independent experiments carried out in duplicates. NS- Non significantly different, when EPA and TCDD group compared to control; when EPA+TCDD compared to TCDD alone treated group.
